# Supplementary material
Source: PubMed Central journal article supplement (PMC2886813)
Supplement: 00711.2009_1.pdf [file 00711.2009_1.pdf]

**Table S1.** List of Proteins Identified by the Proteomic Analysis. Proteins are sorted by the calculated  $R_{SC}$  value as described in the text. Proteins determined to be enriched in the analysis are italicized. Red and green shaded boxes are those proteins enriched in the  $BBMV_{PCT}$  and  $BBMV_{CTX}$  groups, respectively. MW: molecular weight in kDa, TMD: predicted number of transmembrane domains, SpC: Spectral counts of the identified proteins for each biological sample,  $\Sigma SpC$ : the sum of the SpC for each group, p: the FET calculated p values, BY<sub>p</sub>: the adjusted p values using the method of Benjamini and Yekutieli (2001).

| Protein                                                           | Gene                     | IPI                       | MW        | TMD      | SpC           |               |               |               | $\Sigma SpC$ |              | Rsc        | p             | BY <sub>p</sub> |
|-------------------------------------------------------------------|--------------------------|---------------------------|-----------|----------|---------------|---------------|---------------|---------------|--------------|--------------|------------|---------------|-----------------|
|                                                                   |                          |                           |           |          | $BBMV_{CTX1}$ | $BBMV_{CTX2}$ | $BBMV_{PCT1}$ | $BBMV_{PCT2}$ | $BBMV_{CTX}$ | $BBMV_{PCT}$ |            |               |                 |
| <i>ATP synthase subunit beta</i>                                  | <i>Atp5b</i>             | <i>IPI00551812</i>        | 56        | 0        | 0             | 0             | 96            | 171           | 0            | 267          | 9.1        | 0.0000        | 0.0000          |
| <i>Hydroxyacid oxidase 2</i>                                      | <i>Hao2</i>              | <i>IPI00231245</i>        | 39        | 0        | 0             | 0             | 66            | 7             | 0            | 73           | 7.2        | 0.0000        | 0.0000          |
| <i>ATP synthase subunit O</i>                                     | <i>Atp5o</i>             | <i>IPI00195123</i>        | 23        | 0        | 0             | 0             | 26            | 39            | 0            | 65           | 7.0        | 0.0000        | 0.0000          |
| <i>p55 protein</i>                                                | <i>LOC652956</i>         | <i>IPI00464886</i>        | 51        | 0        | 0             | 0             | 34            | 22            | 0            | 56           | 6.8        | 0.0000        | 0.0000          |
| <i>Cytochrome b-c1 complex subunit Rieske</i>                     | <i>Uqcrrs1</i>           | <i>IPI00362949</i>        | 29        | 0        | 0             | 0             | 14            | 28            | 0            | 42           | 6.4        | 0.0000        | 0.0000          |
| <i>Rat alpha-2u-globulin</i>                                      | <i>LOC298116</i>         | <i>IPI00464895</i>        | 21        | 0        | 0             | 0             | 24            | 10            | 0            | 34           | 6.1        | 0.0000        | 0.0000          |
| <i>NADH dehydrogenase (ubiquinone) 1 alpha subcomplex 10-like</i> | <i>Ndufa10l1</i>         | <i>IPI00189759</i>        | 41        | 0        | 0             | 0             | 15            | 16            | 0            | 31           | 6.0        | 0.0000        | 0.0000          |
| <i>Malate dehydrogenase, cytoplasmic</i>                          | <i>Mdh1</i>              | <i>IPI00198717</i>        | 36        | 0        | 0             | 0             | 24            | 7             | 0            | 31           | 6.0        | 0.0000        | 0.0000          |
| <i>Ribonuclease UK114</i>                                         | <i>Hrsp12</i>            | <i>IPI00231292</i>        | 14        | 0        | 0             | 0             | 23            | 5             | 0            | 28           | 5.8        | 0.0000        | 0.0000          |
| <i>A kinase (PRKA) anchor protein 2</i>                           | <i>Akap2</i>             | <i>IPI00364858</i>        | 96        | 0        | 0             | 0             | 3             | 25            | 0            | 28           | 5.8        | 0.0000        | 0.0000          |
| <i>Glutathione peroxidase 1</i>                                   | <i>Gpx1</i>              | <i>IPI00192301</i>        | 22        | 0        | 0             | 0             | 14            | 13            | 0            | 27           | 5.8        | 0.0000        | 0.0000          |
| <i>Fructose-bisphosphate aldolase A</i>                           | <i>Aldoa</i>             | <i>IPI00231734</i>        | 39        | 0        | 0             | 0             | 15            | 10            | 0            | 25           | 5.6        | 0.0000        | 0.0000          |
| <i>Cytochrome b-c1 complex subunit 1</i>                          | <i>Uqcrc1</i>            | <i>IPI00471577</i>        | 53        | 0        | 0             | 0             | 7             | 18            | 0            | 25           | 5.6        | 0.0000        | 0.0000          |
| <i>ATP synthase, H+ transporting, F0 complex, subunit G</i>       | <i>Atp5l</i>             | <i>IPI00421711</i>        | 11        | 0        | 0             | 0             | 7             | 15            | 0            | 22           | 5.5        | 0.0000        | 0.0000          |
| <i>NADH dehydrogenase [ubiquinone] flavoprotein 2</i>             | <i>Ndufv2</i>            | <i>IPI00367152</i>        | 27        | 0        | 0             | 0             | 6             | 16            | 0            | 22           | 5.5        | 0.0000        | 0.0000          |
| <i>Isocitrate dehydrogenase [NADP] cytoplasmic</i>                | <i>Idh1</i>              | <i>IPI00194045</i>        | 47        | 0        | 0             | 0             | 12            | 6             | 0            | 18           | 5.2        | 0.0000        | 0.0002          |
| <i>Rab GDP dissociation inhibitor beta</i>                        | <i>Gdi2</i>              | <i>IPI00197568</i>        | 51        | 0        | 0             | 0             | 17            | 1             | 0            | 18           | 5.2        | 0.0000        | 0.0002          |
| <i>Nucleoside diphosphate kinase B</i>                            | <i>Nme2</i>              | <i>IPI00325189</i>        | 17        | 0        | 0             | 0             | 18            | 0             | 0            | 18           | 5.2        | 0.0000        | 0.0002          |
| <i>Histidine triad nucleotide-binding protein 1</i>               | <i>Hint1</i>             | <i>IPI00231146</i>        | 14        | 0        | 0             | 0             | 12            | 4             | 0            | 16           | 5.0        | 0.0000        | 0.0005          |
| <i>Glyceraldehyde-3-phosphate dehydrogenase</i>                   | <i>Gapdh</i>             | <i>IPI00555252</i>        | 36        | 0        | 0             | 5             | 85            | 88            | 5            | 173          | 5.0        | 0.0000        | 0.0000          |
| ATP synthase gamma chain                                          | <i>Atp5c1</i>            | <i>IPI00454288</i>        | 68        | 0        | 0             | 0             | 9             | 6             | 0            | 15           | 4.9        | 0.0001        | 0.0010          |
| Isoform 1 of Catechol O-methyltransferase                         | <i>Comt</i>              | <i>IPI00210280</i>        | 30        | 1        | 0             | 0             | 11            | 4             | 0            | 15           | 4.9        | 0.0001        | 0.0010          |
| Calcium-binding mitochondrial carrier protein Aralar2             | <i>Slc25a13</i>          | <i>IPI00358163</i>        | 74        | 0        | 0             | 0             | 3             | 12            | 0            | 15           | 4.9        | 0.0001        | 0.0010          |
| Cytochrome c oxidase subunit 4 isoform 1                          | <i>Cox4i1</i>            | <i>IPI00194222</i>        | 20        | 1        | 0             | 0             | 0             | 14            | 0            | 14           | 4.8        | 0.0001        | 0.0019          |
| Isoform 1 of Kynurenine--oxoglutarate transaminase 1              | <i>Ccbl1</i>             | <i>IPI00411232</i>        | 52        | 0        | 0             | 0             | 9             | 4             | 0            | 13           | 4.7        | 0.0002        | 0.0037          |
| <b><i>44 kDa protein, enolase 1, (alpha) isoform 1</i></b>        | <b><i>Eno1a</i></b>      | <b><i>IPI00782342</i></b> | <b>44</b> | <b>0</b> | <b>2</b>      | <b>0</b>      | <b>36</b>     | <b>24</b>     | <b>2</b>     | <b>60</b>    | <b>4.6</b> | <b>0.0000</b> | <b>0.0000</b>   |
| <b><i>ATP synthase subunit alpha</i></b>                          | <b><i>Atp5a1</i></b>     | <b><i>IPI00396910</i></b> | <b>60</b> | <b>0</b> | <b>0</b>      | <b>12</b>     | <b>130</b>    | <b>161</b>    | <b>12</b>    | <b>291</b>   | <b>4.5</b> | <b>0.0000</b> | <b>0.0000</b>   |
| <b><i>91 kDa protein, Erythrocyte protein band 4.1-like 3</i></b> | <b><i>Epb4.1l3</i></b>   | <b><i>IPI00558692</i></b> | <b>91</b> | <b>0</b> | <b>0</b>      | <b>1</b>      | <b>17</b>     | <b>17</b>     | <b>1</b>     | <b>34</b>    | <b>4.5</b> | <b>0.0000</b> | <b>0.0000</b>   |
| Aromatic-L-amino-acid decarboxylase                               | <i>Ddc</i>               | <i>IPI00567511</i>        | 54        | 0        | 0             | 0             | 11            | 0             | 0            | 11           | 4.5        | 0.0010        | 0.0126          |
| hypothetical protein LOC304650                                    | <i>RGD1310262</i>        | <i>IPI00371643</i>        | 23        | 0        | 0             | 0             | 3             | 8             | 0            | 11           | 4.5        | 0.0010        | 0.0126          |
| Cytochrome c oxidase subunit 5A                                   | <i>Cox5a</i>             | <i>IPI00192246</i>        | 16        | 0        | 0             | 0             | 2             | 9             | 0            | 11           | 4.5        | 0.0010        | 0.0126          |
| NADH dehydrogenase (ubiquinone) 1 beta subcomplex, 10             | <i>Ndufb10</i>           | <i>IPI00202238</i>        | 21        | 0        | 0             | 0             | 1             | 9             | 0            | 10           | 4.4        | 0.0020        | 0.0241          |
| <b><i>similar to glyceraldehyde-3-phosphate dehydrogenase</i></b> | <b><i>RGD1565368</i></b> | <b><i>IPI00554039</i></b> | <b>36</b> | <b>0</b> | <b>1</b>      | <b>8</b>      | <b>92</b>     | <b>91</b>     | <b>9</b>     | <b>183</b>   | <b>4.3</b> | <b>0.0000</b> | <b>0.0000</b>   |
| Phosphate carrier protein                                         | <i>Slc25a3</i>           | <i>IPI00562259</i>        | 39        | 2        | 0             | 0             | 2             | 7             | 0            | 9            | 4.2        | 0.0039        | 0.0469          |
| Isoform 2 of Tropomyosin alpha-3 chain                            | <i>Tpm3</i>              | <i>IPI00210941</i>        | 29        | 0        | 0             | 0             | 2             | 7             | 0            | 9            | 4.2        | 0.0039        | 0.0469          |
| <b><i>Alpha-enolase</i></b>                                       | <b><i>Eno1</i></b>       | <b><i>IPI00464815</i></b> | <b>47</b> | <b>0</b> | <b>6</b>      | <b>2</b>      | <b>108</b>    | <b>49</b>     | <b>8</b>     | <b>157</b>   | <b>4.2</b> | <b>0.0000</b> | <b>0.0000</b>   |
| Phosphoglycerate mutase 1                                         | <i>Pgam1</i>             | <i>IPI00421428</i>        | 29        | 0        | 0             | 0             | 6             | 2             | 0            | 8            | 4.1        | 0.0078        | 0.0892          |
| C-1-tetrahydrofolate synthase, cytoplasmic                        | <i>Mthfd1</i>            | <i>IPI00231356</i>        | 101       | 0        | 0             | 0             | 1             | 7             | 0            | 8            | 4.1        | 0.0078        | 0.0892          |

| Protein                                                             | Gene           | IPI                | MW         | TMD      | SpC                  |                      |                      |                      | ΣSpC                |                     | Rsc        | p             | BY <sub>p</sub> |
|---------------------------------------------------------------------|----------------|--------------------|------------|----------|----------------------|----------------------|----------------------|----------------------|---------------------|---------------------|------------|---------------|-----------------|
|                                                                     |                |                    |            |          | BBMV <sub>CTX1</sub> | BBMV <sub>CTX2</sub> | BBMV <sub>PCT1</sub> | BBMV <sub>PCT2</sub> | BBMV <sub>CTX</sub> | BBMV <sub>PCT</sub> |            |               |                 |
| cytochrome c-1                                                      | Cyc1           | IPI00366416        | 35         | 0        | 0                    | 0                    | 1                    | 7                    | 0                   | 8                   | 4.1        | 0.0078        | 0.0892          |
| ATP synthase subunit d                                              | Atp5h          | IPI00230838        | 19         | 0        | 0                    | 0                    | 1                    | 7                    | 0                   | 8                   | 4.1        | 0.0078        | 0.0892          |
| Isoform Mitochondrial of Peroxiredoxin-5                            | Prdx5          | IPI00205745        | 22         | 0        | 0                    | 0                    | 0                    | 8                    | 0                   | 8                   | 4.1        | 0.0078        | 0.0892          |
| <b>Isoform 2 of Electrogenic sodium bicarbonate cotransporter 1</b> | <b>Slc4a4</b>  | <b>IPI00679235</b> | <b>116</b> | <b>9</b> | <b>3</b>             | <b>1</b>             | <b>22</b>            | <b>51</b>            | <b>4</b>            | <b>73</b>           | <b>4.0</b> | <b>0.0000</b> | <b>0.0000</b>   |
| <b>Cytochrome b-c1 complex subunit 2</b>                            | <b>Uqcrc2</b>  | <b>IPI00188924</b> | <b>48</b>  | <b>0</b> | <b>0</b>             | <b>1</b>             | <b>9</b>             | <b>13</b>            | <b>1</b>            | <b>22</b>           | <b>3.9</b> | <b>0.0000</b> | <b>0.0001</b>   |
| Probable oxidoreductase C10orf33 homolog                            | Pyroxd2        | IPI00470325        | 63         | 0        | 0                    | 0                    | 3                    | 4                    | 0                   | 7                   | 3.9        | 0.0156        | 0.1669          |
| NADH-ubiquinone oxidoreductase 75 kDa subunit                       | Ndufs1         | IPI00358033        | 79         | 0        | 0                    | 0                    | 2                    | 5                    | 0                   | 7                   | 3.9        | 0.0156        | 0.1669          |
| Succinate dehydrogenase [ubiquinone] flavoprotein subunit           | Sdha           | IPI00200659        | 72         | 0        | 0                    | 0                    | 1                    | 6                    | 0                   | 7                   | 3.9        | 0.0156        | 0.1669          |
| <b>transketolase</b>                                                | <b>Tkt</b>     | <b>IPI00231139</b> | <b>71</b>  | <b>0</b> | <b>1</b>             | <b>0</b>             | <b>20</b>            | <b>0</b>             | <b>1</b>            | <b>20</b>           | <b>3.7</b> | <b>0.0000</b> | <b>0.0004</b>   |
| <b>Phenylalanine-4-hydroxylase</b>                                  | <b>Pah</b>     | <b>IPI00193258</b> | <b>52</b>  | <b>0</b> | <b>0</b>             | <b>1</b>             | <b>8</b>             | <b>11</b>            | <b>1</b>            | <b>19</b>           | <b>3.7</b> | <b>0.0000</b> | <b>0.0007</b>   |
| Keratin, type II cytoskeletal 1                                     | Krt1           | IPI00421857        | 65         | 0        | 0                    | 0                    | 5                    | 1                    | 0                   | 6                   | 3.7        | 0.0313        | 0.3138          |
| Cytoplasmic aconitate hydratase                                     | Aco1           | IPI00207003        | 98         | 0        | 0                    | 0                    | 4                    | 2                    | 0                   | 6                   | 3.7        | 0.0313        | 0.3138          |
| Mitochondrial 2-oxoglutarate/malate carrier protein                 | Slc25a11       | IPI00231261        | 34         | 0        | 0                    | 0                    | 0                    | 6                    | 0                   | 6                   | 3.7        | 0.0313        | 0.3138          |
| <b>Isoform 2 of Basigin</b>                                         | <b>Bsg</b>     | <b>IPI00193425</b> | <b>30</b>  | <b>1</b> | <b>3</b>             | <b>1</b>             | <b>41</b>            | <b>13</b>            | <b>4</b>            | <b>54</b>           | <b>3.6</b> | <b>0.0000</b> | <b>0.0000</b>   |
| <b>Peptidyl-prolyl cis-trans isomerase A</b>                        | <b>Ppia</b>    | <b>IPI00387771</b> | <b>18</b>  | <b>0</b> | <b>2</b>             | <b>0</b>             | <b>19</b>            | <b>10</b>            | <b>2</b>            | <b>29</b>           | <b>3.5</b> | <b>0.0000</b> | <b>0.0000</b>   |
| <b>Phosphoglycerate kinase 1</b>                                    | <b>Pgk1</b>    | <b>IPI00231426</b> | <b>45</b>  | <b>0</b> | <b>1</b>             | <b>4</b>             | <b>41</b>            | <b>22</b>            | <b>5</b>            | <b>63</b>           | <b>3.5</b> | <b>0.0000</b> | <b>0.0000</b>   |
| Protein DJ-1                                                        | Park7          | IPI00212523        | 20         | 0        | 1                    | 0                    | 14                   | 2                    | 1                   | 16                  | 3.4        | 0.0003        | 0.0041          |
| NADH dehydrogenase [ubiquinone] 1 alpha subcomplex subunit 5        | Ndufa5         | IPI00231997        | 13         | 0        | 0                    | 0                    | 3                    | 2                    | 0                   | 5                   | 3.4        | 0.0625        | 0.5694          |
| Aminoacylase-1A                                                     | Acy1           | IPI00464791        | 46         | 0        | 1                    | 0                    | 15                   | 0                    | 1                   | 15                  | 3.3        | 0.0005        | 0.0071          |
| 60 kDa protein, carboxylesterase ES-4                               | rCG_44273      | IPI00558154        | 60         | 0        | 0                    | 1                    | 11                   | 4                    | 1                   | 15                  | 3.3        | 0.0005        | 0.0071          |
| D-amino-acid oxidase                                                | Dao            | IPI00326225        | 39         | 0        | 0                    | 1                    | 3                    | 12                   | 1                   | 15                  | 3.3        | 0.0005        | 0.0071          |
| <b>L-lactate dehydrogenase B chain</b>                              | <b>Ldhb</b>    | <b>IPI00231783</b> | <b>37</b>  | <b>0</b> | <b>5</b>             | <b>1</b>             | <b>52</b>            | <b>8</b>             | <b>6</b>            | <b>60</b>           | <b>3.2</b> | <b>0.0000</b> | <b>0.0000</b>   |
| <b>Cofilin-1</b>                                                    | <b>Cfl1</b>    | <b>IPI00327144</b> | <b>19</b>  | <b>0</b> | <b>0</b>             | <b>2</b>             | <b>17</b>            | <b>5</b>             | <b>2</b>            | <b>22</b>           | <b>3.1</b> | <b>0.0000</b> | <b>0.0006</b>   |
| Xaa-Pro dipeptidase                                                 | Pepd           | IPI00364304        | 55         | 0        | 0                    | 0                    | 4                    | 0                    | 0                   | 4                   | 3.1        | 0.1251        | 1.0000          |
| similar to procollagen, type IV, alpha 5                            | Col4a5         | IPI00367440        | 161        | 0        | 0                    | 0                    | 3                    | 1                    | 0                   | 4                   | 3.1        | 0.1251        | 1.0000          |
| similar to aldehyde dehydrogenase family 7, member A1               | Aldh7a1        | IPI00208917        | 59         | 0        | 0                    | 0                    | 2                    | 2                    | 0                   | 4                   | 3.1        | 0.1251        | 1.0000          |
| Prohibitin-2                                                        | Phb2           | IPI00190557        | 33         | 0        | 0                    | 0                    | 1                    | 3                    | 0                   | 4                   | 3.1        | 0.1251        | 1.0000          |
| ATP synthase subunit b                                              | Atp5f1         | IPI00196107        | 29         | 0        | 0                    | 0                    | 1                    | 3                    | 0                   | 4                   | 3.1        | 0.1251        | 1.0000          |
| Isoform 1 of Brain-specific angiogenesis inhibitor 1- protein 2     | Baiap2         | IPI00203614        | 59         | 0        | 0                    | 0                    | 0                    | 4                    | 0                   | 4                   | 3.1        | 0.1251        | 1.0000          |
| <b>ADP/ATP translocase 2</b>                                        | <b>Slc25a5</b> | <b>IPI00200466</b> | <b>33</b>  | <b>2</b> | <b>0</b>             | <b>10</b>            | <b>46</b>            | <b>43</b>            | <b>10</b>           | <b>89</b>           | <b>3.1</b> | <b>0.0000</b> | <b>0.0000</b>   |
| Integrin beta-1                                                     | Itgb1          | IPI00191681        | 88         | 1        | 1                    | 1                    | 9                    | 10                   | 2                   | 19                  | 2.9        | 0.0002        | 0.0035          |
| <b>Argininosuccinate synthase</b>                                   | <b>Ass1</b>    | <b>IPI00211127</b> | <b>46</b>  | <b>0</b> | <b>12</b>            | <b>12</b>            | <b>112</b>           | <b>74</b>            | <b>24</b>           | <b>186</b>          | <b>2.9</b> | <b>0.0000</b> | <b>0.0000</b>   |
| Collagen alpha-1(I) chain                                           | Col1a1         | IPI00188909        | 138        | 0        | 0                    | 0                    | 1                    | 2                    | 0                   | 3                   | 2.8        | 0.2501        | 1.0000          |
| 60S ribosomal protein L3                                            | Rpl3           | IPI00395285        | 46         | 0        | 0                    | 0                    | 1                    | 2                    | 0                   | 3                   | 2.8        | 0.2501        | 1.0000          |
| 78 kDa glucose-regulated protein                                    | Hspa5          | IPI00206624        | 72         | 0        | 0                    | 0                    | 1                    | 2                    | 0                   | 3                   | 2.8        | 0.2501        | 1.0000          |
| ankyrin 3, epithelial isoform 2                                     | Ank3           | IPI00199445        | 284        | 0        | 0                    | 0                    | 0                    | 3                    | 0                   | 3                   | 2.8        | 0.2501        | 1.0000          |
| ATP synthase-coupling factor 6                                      | Atp5j          | IPI00204316        | 12         | 0        | 0                    | 0                    | 0                    | 3                    | 0                   | 3                   | 2.8        | 0.2501        | 1.0000          |
| <b>Sorbitol dehydrogenase</b>                                       | <b>Sord</b>    | <b>IPI00760137</b> | <b>38</b>  | <b>0</b> | <b>6</b>             | <b>0</b>             | <b>38</b>            | <b>3</b>             | <b>6</b>            | <b>41</b>           | <b>2.6</b> | <b>0.0000</b> | <b>0.0000</b>   |
| <b>Alcohol dehydrogenase [NADP+]</b>                                | <b>Akr1a1</b>  | <b>IPI00230859</b> | <b>37</b>  | <b>0</b> | <b>12</b>            | <b>6</b>             | <b>72</b>            | <b>44</b>            | <b>18</b>           | <b>116</b>          | <b>2.6</b> | <b>0.0000</b> | <b>0.0000</b>   |
| <b>ADP,ATP carrier protein 2</b>                                    | <b>Slc25a5</b> | <b>IPI00561209</b> | <b>22</b>  | <b>0</b> | <b>0</b>             | <b>10</b>            | <b>29</b>            | <b>31</b>            | <b>10</b>           | <b>60</b>           | <b>2.5</b> | <b>0.0000</b> | <b>0.0000</b>   |
| Acyl-coenzyme A synthetase ACSM2                                    | Acsm2          | IPI00198641        | 64         | 0        | 0                    | 0                    | 0                    | 2                    | 0                   | 2                   | 2.3        | 0.5000        | 1.0000          |
| similar to FLJ44048 protein                                         | Fsp2           | IPI00767813        | 762        | 0        | 0                    | 0                    | 0                    | 2                    | 0                   | 2                   | 2.3        | 0.5000        | 1.0000          |

| Protein                                                         | Gene            | IPI                | MW         | TMD      | SpC                  |                      |                      |                      | ΣSpC                |                     | Rsc        | p             | BY <sub>p</sub> |
|-----------------------------------------------------------------|-----------------|--------------------|------------|----------|----------------------|----------------------|----------------------|----------------------|---------------------|---------------------|------------|---------------|-----------------|
|                                                                 |                 |                    |            |          | BBMV <sub>CTX1</sub> | BBMV <sub>CTX2</sub> | BBMV <sub>PCT1</sub> | BBMV <sub>PCT2</sub> | BBMV <sub>CTX</sub> | BBMV <sub>PCT</sub> |            |               |                 |
| Isoform 1 of Protein transport protein Sec31A                   | Sec31a          | IPI00210147        | 135        | 0        | 0                    | 0                    | 0                    | 2                    | 0                   | 2                   | 2.3        | 0.5000        | 1.0000          |
| Integrin alpha-1                                                | Itga1           | IPI00324585        | 131        | 2        | 0                    | 0                    | 0                    | 2                    | 0                   | 2                   | 2.3        | 0.5000        | 1.0000          |
| Brain acid soluble protein 1                                    | Basp1           | IPI00231651        | 22         | 0        | 6                    | 0                    | 26                   | 4                    | 6                   | 30                  | 2.2        | 0.0001        | 0.0012          |
| Cytochrome P450 2C23                                            | Cyp2c23         | IPI00327991        | 56         | 1        | 3                    | 2                    | 10                   | 14                   | 5                   | 24                  | 2.1        | 0.0006        | 0.0075          |
| <b>Heat shock cognate 71 kDa protein</b>                        | <b>Hspa8</b>    | <b>IPI00208205</b> | <b>71</b>  | <b>0</b> | <b>16</b>            | <b>20</b>            | <b>84</b>            | <b>72</b>            | <b>36</b>           | <b>156</b>          | <b>2.1</b> | <b>0.0000</b> | <b>0.0000</b>   |
| Triosephosphate isomerase                                       | Tpi1            | IPI00231767        | 27         | 0        | 5                    | 1                    | 16                   | 11                   | 6                   | 27                  | 2.1        | 0.0003        | 0.0048          |
| <b>Spectrin alpha chain, brain</b>                              | <b>Spna2</b>    | <b>IPI00209258</b> | <b>285</b> | <b>0</b> | <b>1</b>             | <b>23</b>            | <b>43</b>            | <b>57</b>            | <b>24</b>           | <b>100</b>          | <b>2.0</b> | <b>0.0000</b> | <b>0.0000</b>   |
| <b>Alpha-actinin-4</b>                                          | <b>Actn4</b>    | <b>IPI00213463</b> | <b>105</b> | <b>0</b> | <b>32</b>            | <b>39</b>            | <b>134</b>           | <b>148</b>           | <b>71</b>           | <b>282</b>          | <b>2.0</b> | <b>0.0000</b> | <b>0.0000</b>   |
| <b>Non-erythrocyte beta-spectrin</b>                            | <b>Sptbn1</b>   | <b>IPI00373419</b> | <b>251</b> | <b>0</b> | <b>7</b>             | <b>16</b>            | <b>32</b>            | <b>55</b>            | <b>23</b>           | <b>87</b>           | <b>1.9</b> | <b>0.0000</b> | <b>0.0000</b>   |
| ATP-dependent dihydroxyacetone kinase/FAD-AMP lyase             | Dak             | IPI00372498        | 59         | 0        | 1                    | 0                    | 5                    | 0                    | 1                   | 5                   | 1.8        | 0.2188        | 1.0000          |
| <b>Fructose-1,6-bisphosphatase 1</b>                            | <b>Fbp1</b>     | <b>IPI00231745</b> | <b>40</b>  | <b>0</b> | <b>29</b>            | <b>12</b>            | <b>87</b>            | <b>51</b>            | <b>41</b>           | <b>138</b>          | <b>1.7</b> | <b>0.0000</b> | <b>0.0000</b>   |
| <b>Elongation factor 1-alpha 1</b>                              | <b>Eef1a1</b>   | <b>IPI00195372</b> | <b>50</b>  | <b>0</b> | <b>7</b>             | <b>29</b>            | <b>45</b>            | <b>71</b>            | <b>36</b>           | <b>116</b>          | <b>1.7</b> | <b>0.0000</b> | <b>0.0000</b>   |
| <b>Superoxide dismutase [Cu-Zn]</b>                             | <b>Sod1</b>     | <b>IPI00231643</b> | <b>16</b>  | <b>0</b> | <b>12</b>            | <b>4</b>             | <b>27</b>            | <b>25</b>            | <b>16</b>           | <b>52</b>           | <b>1.6</b> | <b>0.0000</b> | <b>0.0003</b>   |
| 11 kDa protein, Histone H4                                      | H4              | IPI00231340        | 11         | 0        | 1                    | 8                    | 19                   | 10                   | 9                   | 29                  | 1.6        | 0.0017        | 0.0212          |
| Chloride intracellular channel protein 1                        | Clic1           | IPI00421995        | 27         | 0        | 10                   | 1                    | 19                   | 15                   | 11                  | 34                  | 1.6        | 0.0008        | 0.0111          |
| Cytosolic non-specific dipeptidase                              | Cndp2           | IPI00421899        | 53         | 0        | 1                    | 0                    | 3                    | 1                    | 1                   | 4                   | 1.6        | 0.3751        | 1.0000          |
| similar to aldehyde dehydrogenase 8 family, member A1 isoform 2 | LOC683474       | IPI00359623        | 53         | 0        | 3                    | 9                    | 20                   | 16                   | 12                  | 36                  | 1.5        | 0.0007        | 0.0097          |
| Heat shock protein HSP 90-beta                                  | Hsp90ab1        | IPI00471584        | 83         | 0        | 7                    | 12                   | 36                   | 16                   | 19                  | 52                  | 1.4        | 0.0001        | 0.0019          |
| Voltage-dependent anion-selective channel protein 2             | Vdac2           | IPI00198327        | 32         | 0        | 0                    | 5                    | 0                    | 14                   | 5                   | 14                  | 1.4        | 0.0637        | 0.5771          |
| 14-3-3 protein zeta/delta                                       | Ywhaz           | IPI00324893        | 28         | 0        | 14                   | 4                    | 34                   | 14                   | 18                  | 48                  | 1.4        | 0.0003        | 0.0043          |
| Cytoplasmic dynein 1 heavy chain 1                              | Dync1h1         | IPI00327630        | 532        | 0        | 3                    | 4                    | 11                   | 8                    | 7                   | 19                  | 1.4        | 0.0291        | 0.2972          |
| glutathione S-transferase, theta 3                              | Gstt3           | IPI00915569        | 23         | 0        | 1                    | 1                    | 5                    | 1                    | 2                   | 6                   | 1.4        | 0.2892        | 1.0000          |
| <b>Sulfotransferase 1C2</b>                                     | <b>Sult1c2</b>  | <b>IPI00204467</b> | <b>35</b>  | <b>0</b> | <b>22</b>            | <b>6</b>             | <b>41</b>            | <b>31</b>            | <b>28</b>           | <b>72</b>           | <b>1.3</b> | <b>0.0000</b> | <b>0.0003</b>   |
| <b>Fructose-bisphosphate aldolase</b>                           | <b>Aldob</b>    | <b>IPI00876620</b> | <b>40</b>  | <b>0</b> | <b>38</b>            | <b>92</b>            | <b>164</b>           | <b>163</b>           | <b>130</b>          | <b>327</b>          | <b>1.3</b> | <b>0.0000</b> | <b>0.0000</b>   |
| UPF0404 protein C11orf59 homolog                                | MGC72560        | IPI00207707        | 18         | 0        | 1                    | 5                    | 14                   | 2                    | 6                   | 16                  | 1.3        | 0.0527        | 0.4927          |
| <b>Isoform 1 of Mucin and cadherin-like protein</b>             | <b>Mucdhl</b>   | <b>IPI00200640</b> | <b>91</b>  | <b>1</b> | <b>19</b>            | <b>29</b>            | <b>72</b>            | <b>43</b>            | <b>48</b>           | <b>115</b>          | <b>1.2</b> | <b>0.0000</b> | <b>0.0000</b>   |
| <b>Na(+)/H(+) exchange regulatory cofactor NHE-RF1</b>          | <b>Slc9a3r1</b> | <b>IPI00200898</b> | <b>39</b>  | <b>0</b> | <b>25</b>            | <b>44</b>            | <b>66</b>            | <b>95</b>            | <b>69</b>           | <b>161</b>          | <b>1.2</b> | <b>0.0000</b> | <b>0.0000</b>   |
| Histone H2A                                                     | H2A             | IPI00188688        | 14         | 0        | 0                    | 8                    | 9                    | 10                   | 8                   | 19                  | 1.2        | 0.0525        | 0.4927          |
| Membrane-bound carbonic anhydrase 12                            | Car12           | IPI00366665        | 40         | 1        | 6                    | 3                    | 13                   | 7                    | 9                   | 20                  | 1.1        | 0.0617        | 0.5646          |
| Sulfotransferase 1C2A                                           | Sult1c2a        | IPI00204469        | 35         | 0        | 18                   | 6                    | 27                   | 25                   | 24                  | 52                  | 1.1        | 0.0018        | 0.0226          |
| 60S acidic ribosomal protein P2                                 | Rplp2           | IPI00188804        | 12         | 0        | 3                    | 4                    | 8                    | 7                    | 7                   | 15                  | 1.0        | 0.1341        | 1.0000          |
| Ras-related protein Rab-7a                                      | Rab7a           | IPI00215564        | 24         | 0        | 5                    | 29                   | 51                   | 15                   | 34                  | 66                  | 0.9        | 0.0019        | 0.0230          |
| Alpha-2-macroglobulin receptor-associated protein               | Lrpap1          | IPI00364124        | 42         | 0        | 1                    | 2                    | 6                    | 0                    | 3                   | 6                   | 0.9        | 0.5079        | 1.0000          |
| similar to Heterogeneous nuclear ribonucleoprotein A1           | Hdp1            | IPI00567346        | 35         | 0        | 2                    | 1                    | 3                    | 3                    | 3                   | 6                   | 0.9        | 0.5079        | 1.0000          |
| Glutamate dehydrogenase 1                                       | Glud1           | IPI00324633        | 61         | 0        | 2                    | 10                   | 0                    | 22                   | 12                  | 22                  | 0.8        | 0.1219        | 1.0000          |
| Peroxiredoxin-1                                                 | Prdx1           | IPI00211779        | 22         | 0        | 36                   | 24                   | 32                   | 76                   | 60                  | 108                 | 0.8        | 0.0004        | 0.0051          |
| Heat shock protein HSP 90-alpha                                 | Hsp90aa1        | IPI00210566        | 85         | 0        | 10                   | 16                   | 32                   | 13                   | 26                  | 45                  | 0.8        | 0.0323        | 0.3206          |
| Chloride intracellular channel protein 4                        | Clic4           | IPI00208249        | 29         | 0        | 29                   | 32                   | 36                   | 68                   | 61                  | 104                 | 0.7        | 0.0013        | 0.0169          |
| 4F2 cell-surface antigen heavy chain                            | Slc3a2          | IPI00211616        | 58         | 1        | 57                   | 57                   | 105                  | 86                   | 114                 | 191                 | 0.7        | 0.0000        | 0.0004          |
| Ubc protein                                                     | Ubc             | IPI00476033        | 48         | 0        | 11                   | 16                   | 28                   | 16                   | 27                  | 44                  | 0.7        | 0.0574        | 0.5314          |
| Sodium- and chloride-dependent creatine transporter 1           | Slc6a8          | IPI00325655        | 71         | 12       | 0                    | 6                    | 4                    | 6                    | 6                   | 10                  | 0.7        | 0.4547        | 1.0000          |
| Tumor-associated calcium signal transducer 1                    | Epcam           | IPI00324820        | 35         | 1        | 9                    | 9                    | 16                   | 13                   | 18                  | 29                  | 0.6        | 0.1445        | 1.0000          |

| Protein                                                | Gene      | IPI         | MW  | TMD | SpC                  |                      |                      |                      | ΣSpC                |                     | Rsc  | p      | BY <sub>p</sub> |
|--------------------------------------------------------|-----------|-------------|-----|-----|----------------------|----------------------|----------------------|----------------------|---------------------|---------------------|------|--------|-----------------|
|                                                        |           |             |     |     | BBMV <sub>CTX1</sub> | BBMV <sub>CTX2</sub> | BBMV <sub>PCT1</sub> | BBMV <sub>PCT2</sub> | BBMV <sub>CTX</sub> | BBMV <sub>PCT</sub> |      |        |                 |
| Isoform p82 of Disabled homolog 2                      | Dab2      | IPI00212608 | 82  | 0   | 17                   | 40                   | 44                   | 47                   | 57                  | 91                  | 0.6  | 0.0082 | 0.0929          |
| ATPase, H transporting, lysosomal V1 subunit G1        | Atp6v1g1  | IPI00199600 | 14  | 0   | 20                   | 22                   | 39                   | 26                   | 42                  | 65                  | 0.6  | 0.0415 | 0.4041          |
| Actin-related protein 3                                | Actr3     | IPI00363828 | 48  | 0   | 2                    | 5                    | 6                    | 5                    | 7                   | 11                  | 0.6  | 0.4810 | 1.0000          |
| Glutamate carboxypeptidase 2                           | Folh1     | IPI00190555 | 85  | 1   | 24                   | 24                   | 47                   | 23                   | 48                  | 70                  | 0.5  | 0.0647 | 0.5824          |
| PDZK1-interacting protein 1                            | Pdzk1ip1  | IPI00203992 | 12  | 1   | 20                   | 25                   | 28                   | 37                   | 45                  | 65                  | 0.5  | 0.0851 | 0.7544          |
| 14-3-3 protein epsilon                                 | Ywhae     | IPI00325135 | 29  | 0   | 7                    | 0                    | 7                    | 3                    | 7                   | 10                  | 0.5  | 0.6293 | 1.0000          |
| ATPase, H+ transporting, lysosomal V1 subunit H        | Atp6v1h   | IPI00364780 | 51  | 0   | 18                   | 30                   | 29                   | 37                   | 48                  | 66                  | 0.4  | 0.1330 | 1.0000          |
| V-type proton ATPase subunit B, brain isoform          | Atp6v1b2  | IPI00199305 | 57  | 0   | 117                  | 115                  | 144                  | 163                  | 232                 | 307                 | 0.4  | 0.0027 | 0.0327          |
| 30 kDa protein,Protein fem-1 homolog C                 | Fem1c     | IPI00781207 | 30  | 0   | 1                    | 2                    | 3                    | 1                    | 3                   | 4                   | 0.3  | 1.0000 | 1.0000          |
| Tubulin alpha-4A chain                                 | Tuba4a    | IPI00362927 | 50  | 0   | 17                   | 31                   | 28                   | 32                   | 48                  | 60                  | 0.3  | 0.3351 | 1.0000          |
| Na+/K+ -ATPase a-1                                     | Atp1a1    | IPI00326305 | 113 | 10  | 357                  | 371                  | 480                  | 415                  | 728                 | 895                 | 0.3  | 0.0001 | 0.0021          |
| Protein NDRG1                                          | Ndr1      | IPI00421389 | 43  | 0   | 7                    | 11                   | 12                   | 10                   | 18                  | 22                  | 0.3  | 0.6363 | 1.0000          |
| Sodium/potassium-transporting ATPase subunit a-3       | Atp1a3    | IPI00231451 | 112 | 8   | 142                  | 139                  | 202                  | 135                  | 281                 | 337                 | 0.2  | 0.0465 | 0.4448          |
| Voltage-dependent anion-selective channel protein 1    | Vdac1     | IPI00421874 | 31  | 0   | 8                    | 38                   | 15                   | 40                   | 46                  | 55                  | 0.2  | 0.4856 | 1.0000          |
| EH domain-containing protein 1                         | Ehd1      | IPI00360340 | 61  | 0   | 18                   | 25                   | 25                   | 26                   | 43                  | 51                  | 0.2  | 0.4719 | 1.0000          |
| Macrophage migration inhibitory factor                 | Mif       | IPI00230907 | 12  | 0   | 5                    | 0                    | 5                    | 1                    | 5                   | 6                   | 0.2  | 1.0000 | 1.0000          |
| Mitogen-activated protein kinase scaffold protein 1    | Map2k1ip1 | IPI00373435 | 14  | 0   | 1                    | 4                    | 4                    | 2                    | 5                   | 6                   | 0.2  | 1.0000 | 1.0000          |
| Sodium/potassium-transporting ATPase subunit beta-1    | Atp1b1    | IPI00339124 | 35  | 1   | 107                  | 127                  | 147                  | 125                  | 234                 | 272                 | 0.2  | 0.1515 | 1.0000          |
| Isoform 1 of Tubulin beta-5 chain                      | Tubb5     | IPI00197579 | 50  | 0   | 26                   | 41                   | 40                   | 38                   | 67                  | 78                  | 0.2  | 0.4542 | 1.0000          |
| V-type proton ATPase subunit E 1                       | Atp6v1e1  | IPI00400615 | 26  | 0   | 48                   | 61                   | 55                   | 65                   | 109                 | 120                 | 0.1  | 0.5959 | 1.0000          |
| Actin, a skeletal muscle                               | Acta1     | IPI00189813 | 42  | 0   | 194                  | 218                  | 207                  | 236                  | 412                 | 443                 | 0.1  | 0.4458 | 1.0000          |
| Protein FAM151A                                        | Fam151a   | IPI00471666 | 67  | 1   | 24                   | 18                   | 20                   | 25                   | 42                  | 45                  | 0.1  | 0.8309 | 1.0000          |
| Cadherin 16                                            | Cdh16     | IPI00471800 | 90  | 1   | 19                   | 25                   | 23                   | 24                   | 44                  | 47                  | 0.1  | 0.8346 | 1.0000          |
| Ezrin                                                  | Ezr       | IPI00470254 | 69  | 0   | 144                  | 184                  | 158                  | 185                  | 328                 | 343                 | 0.0  | 0.7551 | 1.0000          |
| Actin, cytoplasmic 1                                   | Actb      | IPI00189819 | 42  | 0   | 356                  | 478                  | 385                  | 474                  | 834                 | 859                 | 0.0  | 0.8417 | 1.0000          |
| Vanin 1                                                | Vnn1      | IPI00371710 | 57  | 0   | 0                    | 2                    | 2                    | 0                    | 2                   | 2                   | 0.0  | 1.0000 | 1.0000          |
| Potential RabGAP                                       | Tbc1d10a  | IPI00190657 | 57  | 0   | 1                    | 3                    | 0                    | 4                    | 4                   | 4                   | 0.0  | 1.0000 | 1.0000          |
| Glutathione S-transferase alpha-1                      | Gsta2     | IPI00231638 | 26  | 0   | 3                    | 2                    | 3                    | 2                    | 5                   | 5                   | 0.0  | 1.0000 | 1.0000          |
| 40S ribosomal protein S7                               | Rps7      | IPI00214582 | 22  | 0   | 6                    | 4                    | 4                    | 6                    | 10                  | 10                  | 0.0  | 1.0000 | 1.0000          |
| NHE3 regulatory cofactor NHE-RF3                       | Pdzk1     | IPI00200998 | 57  | 0   | 187                  | 444                  | 270                  | 353                  | 631                 | 623                 | 0.0  | 0.5646 | 1.0000          |
| Maltase-glucoamylase                                   | Mgam      | IPI00193894 | 198 | 1   | 153                  | 217                  | 159                  | 202                  | 370                 | 361                 | -0.1 | 0.5496 | 1.0000          |
| 64 Kda Protein, Similar to Maltase-Glucoamylase        | Acly      | IPI00191437 | 64  | 0   | 58                   | 125                  | 66                   | 104                  | 183                 | 170                 | -0.1 | 0.3920 | 1.0000          |
| V-type proton ATPase subunit F                         | Atp6v1f   | IPI00198291 | 13  | 0   | 1                    | 12                   | 3                    | 9                    | 13                  | 12                  | -0.1 | 0.8436 | 1.0000          |
| Sushi Domain containing protein                        | Susd2     | IPI00191919 | 91  | 0   | 125                  | 136                  | 112                  | 128                  | 261                 | 240                 | -0.2 | 0.2421 | 1.0000          |
| 60S ribosomal protein L4                               | Rpl4      | IPI00202512 | 47  | 0   | 16                   | 17                   | 14                   | 16                   | 33                  | 30                  | -0.2 | 0.7058 | 1.0000          |
| Alkaline phosphatase, tissue-nonspecific isozyme       | Alpl      | IPI00327143 | 58  | 0   | 10                   | 9                    | 12                   | 5                    | 19                  | 17                  | -0.2 | 0.7406 | 1.0000          |
| Transient receptor potential cation channel V member 4 | Trpv4     | IPI00191593 | 98  | 6   | 2                    | 7                    | 2                    | 6                    | 9                   | 8                   | -0.2 | 0.8128 | 1.0000          |
| Cytochrome P450 4A2                                    | Cyp4a2    | IPI00203317 | 58  | 1   | 8                    | 1                    | 1                    | 7                    | 9                   | 8                   | -0.2 | 0.8128 | 1.0000          |
| ATPase, H+ transporting, lysosomal V1 subunit A        | Atp6v1a   | IPI00373076 | 68  | 0   | 126                  | 96                   | 111                  | 85                   | 222                 | 196                 | -0.2 | 0.1399 | 1.0000          |
| Sodium/glucose cotransporter 2                         | Slc5a2    | IPI00212934 | 73  | 14  | 137                  | 152                  | 143                  | 111                  | 289                 | 254                 | -0.2 | 0.0834 | 0.7431          |
| actin, beta-like 2                                     | Actb2     | IPI00360356 | 42  | 0   | 77                   | 91                   | 69                   | 77                   | 168                 | 146                 | -0.2 | 0.1566 | 1.0000          |
| Tubulin alpha-1B chain                                 | Tuba1b    | IPI00339167 | 50  | 0   | 38                   | 50                   | 35                   | 41                   | 88                  | 76                  | -0.2 | 0.3090 | 1.0000          |

| Protein                                                           | Gene       | IPI         | MW  | TMD | SpC                  |                      |                      |                      | ΣSpC                |                     | Rsc  | p      | BY <sub>p</sub> |
|-------------------------------------------------------------------|------------|-------------|-----|-----|----------------------|----------------------|----------------------|----------------------|---------------------|---------------------|------|--------|-----------------|
|                                                                   |            |             |     |     | BBMV <sub>CTX1</sub> | BBMV <sub>CTX2</sub> | BBMV <sub>PCT1</sub> | BBMV <sub>PCT2</sub> | BBMV <sub>CTX</sub> | BBMV <sub>PCT</sub> |      |        |                 |
| amionless homolog                                                 | Amn        | IPI00870509 | 49  | 1   | 3                    | 3                    | 2                    | 3                    | 6                   | 5                   | -0.3 | 0.7722 | 1.0000          |
| Radixin                                                           | Rdx        | IPI00369635 | 69  | 0   | 73                   | 64                   | 54                   | 61                   | 137                 | 115                 | -0.3 | 0.1291 | 1.0000          |
| Ras homolog gene family, member C                                 | Rhoc       | IPI00191114 | 22  | 0   | 21                   | 20                   | 18                   | 16                   | 41                  | 34                  | -0.3 | 0.4187 | 1.0000          |
| Pls1 protein                                                      | Pls1       | IPI00370844 | 70  | 0   | 23                   | 43                   | 25                   | 29                   | 66                  | 54                  | -0.3 | 0.2355 | 1.0000          |
| similar to Na+ dependent glucose transporter 1                    | RGD1310495 | IPI00361210 | 55  | 11  | 13                   | 14                   | 12                   | 10                   | 27                  | 22                  | -0.3 | 0.4762 | 1.0000          |
| Syntaxin-binding protein 2                                        | Stxbp2     | IPI00208188 | 67  | 0   | 9                    | 15                   | 6                    | 13                   | 24                  | 19                  | -0.4 | 0.4475 | 1.0000          |
| Cytochrome c, somatic                                             | Cycc       | IPI00231864 | 12  | 0   | 14                   | 19                   | 12                   | 14                   | 33                  | 26                  | -0.4 | 0.3625 | 1.0000          |
| 10-formyltetrahydrofolate dehydrogenase                           | Aldh1l1    | IPI00196725 | 99  | 0   | 4                    | 0                    | 3                    | 0                    | 4                   | 3                   | -0.4 | 0.7239 | 1.0000          |
| Vil1 protein                                                      | Vil1       | IPI00362757 | 93  | 0   | 138                  | 221                  | 132                  | 148                  | 359                 | 280                 | -0.4 | 0.0007 | 0.0090          |
| Dipeptidyl peptidase 4                                            | Dpp4       | IPI00208422 | 88  | 1   | 313                  | 219                  | 244                  | 165                  | 532                 | 409                 | -0.4 | 0.0000 | 0.0002          |
| Aminopeptidase N                                                  | Anpep      | IPI00230862 | 109 | 1   | 322                  | 505                  | 331                  | 304                  | 827                 | 635                 | -0.4 | 0.0000 | 0.0000          |
| 4 kDa protein, Putative glycine-rich cell wall structural protein |            | IPI00782004 | 4   | 0   | 0                    | 7                    | 3                    | 2                    | 7                   | 5                   | -0.5 | 0.5773 | 1.0000          |
| Lysosome-associated membrane glycoprotein 1                       | Lamp1      | IPI00206336 | 44  | 1   | 39                   | 41                   | 32                   | 26                   | 80                  | 58                  | -0.5 | 0.0497 | 0.4701          |
| Myosin-9                                                          | Myh9       | IPI00209113 | 226 | 0   | 24                   | 91                   | 20                   | 63                   | 115                 | 83                  | -0.5 | 0.0184 | 0.1941          |
| Collectrin                                                        | Tmem27     | IPI00191929 | 25  | 1   | 63                   | 57                   | 41                   | 44                   | 120                 | 85                  | -0.5 | 0.0095 | 0.1064          |
| Low-density lipoprotein receptor-related protein 2                | Lrp2       | IPI00205325 | 519 | 1   | 368                  | 318                  | 289                  | 198                  | 686                 | 487                 | -0.5 | 0.0000 | 0.0000          |
| Moesin                                                            | Msn        | IPI00212314 | 68  | 0   | 141                  | 162                  | 81                   | 132                  | 303                 | 213                 | -0.5 | 0.0000 | 0.0004          |
| Ectonucleotide pyrophosphatase/phosphodiesterase member 6         | Enpp6      | IPI00358524 | 51  | 0   | 19                   | 0                    | 10                   | 3                    | 19                  | 13                  | -0.6 | 0.2919 | 1.0000          |
| Membrane-bound aminopeptidase P                                   | Xpnpep2    | IPI00197684 | 76  | 0   | 86                   | 59                   | 66                   | 32                   | 145                 | 98                  | -0.6 | 0.0016 | 0.0198          |
| Homogentisate 1, 2-dioxygenase                                    | Hgd        | IPI00556987 | 50  | 0   | 13                   | 9                    | 7                    | 7                    | 22                  | 14                  | -0.7 | 0.1839 | 1.0000          |
| Lysozyme C-1                                                      | Lyz2       | IPI00211927 | 17  | 0   | 41                   | 45                   | 38                   | 17                   | 86                  | 55                  | -0.7 | 0.0068 | 0.0800          |
| Electroneutral sodium monocarboxylate cotransporter               | Slc5a12    | IPI00769286 | 68  | 13  | 33                   | 29                   | 18                   | 21                   | 62                  | 39                  | -0.7 | 0.0214 | 0.2215          |
| Tripeptidyl-peptidase 1                                           | Tpp1       | IPI00190499 | 61  | 0   | 5                    | 8                    | 3                    | 5                    | 13                  | 8                   | -0.7 | 0.2818 | 1.0000          |
| Sodium-dependent phosphate transport protein 2C                   | Slc34a3    | IPI00203529 | 64  | 11  | 15                   | 23                   | 14                   | 9                    | 38                  | 23                  | -0.7 | 0.0540 | 0.5022          |
| Ras-related protein Rap-1A                                        | Rap1a      | IPI00187747 | 21  | 0   | 16                   | 24                   | 14                   | 10                   | 40                  | 24                  | -0.8 | 0.0447 | 0.4299          |
| similar to myosin XVIIIa                                          | LOC360570  | IPI00568245 | 233 | 0   | 0                    | 2                    | 0                    | 1                    | 2                   | 1                   | -0.8 | 0.6213 | 1.0000          |
| Sodium/hydrogen exchanger 3                                       | Slc9a3     | IPI00193371 | 93  | 12  | 0                    | 2                    | 0                    | 1                    | 2                   | 1                   | -0.8 | 0.6213 | 1.0000          |
| Isoform 1 of Glutamyl aminopeptidase                              | Enpep      | IPI00327398 | 108 | 1   | 144                  | 90                   | 81                   | 54                   | 234                 | 135                 | -0.8 | 0.0000 | 0.0000          |
| ATPase, H+ transporting, lysosomal V1 subunit D                   | Atp6v1d    | IPI00365851 | 28  | 0   | 17                   | 17                   | 7                    | 12                   | 34                  | 19                  | -0.9 | 0.0386 | 0.3781          |
| Cubilin                                                           | Cubn       | IPI00196620 | 399 | 0   | 8                    | 12                   | 9                    | 2                    | 20                  | 11                  | -0.9 | 0.1070 | 0.9434          |
| Ras-related C3 botulinum toxin substrate 1                        | Rac1       | IPI00422092 | 21  | 0   | 20                   | 18                   | 9                    | 12                   | 38                  | 21                  | -0.9 | 0.0261 | 0.2684          |
| Myosin light polypeptide 6                                        | Myf6l      | IPI00365944 | 17  | 0   | 17                   | 14                   | 7                    | 10                   | 31                  | 17                  | -0.9 | 0.0426 | 0.4126          |
| ATP-binding cassette protein C4                                   | Abcc4      | IPI00421457 | 149 | 9   | 15                   | 24                   | 10                   | 11                   | 39                  | 21                  | -0.9 | 0.0194 | 0.2033          |
| Calmodulin                                                        | Calm3      | IPI00231955 | 17  | 0   | 15                   | 26                   | 7                    | 15                   | 41                  | 22                  | -0.9 | 0.0160 | 0.1697          |
| Guanine nucleotide-binding protein G(I)/G(S)/G(T) subunit beta-2  | Gnb2       | IPI00212658 | 37  | 0   | 34                   | 54                   | 27                   | 20                   | 88                  | 47                  | -0.9 | 0.0003 | 0.0041          |
| Dipeptidase 1                                                     | Dpep1      | IPI00327697 | 46  | 0   | 73                   | 58                   | 45                   | 25                   | 131                 | 70                  | -0.9 | 0.0000 | 0.0002          |
| Folate binding protein                                            | Folr1      | IPI00202950 | 29  | 0   | 14                   | 11                   | 9                    | 3                    | 25                  | 12                  | -1.1 | 0.0320 | 0.3193          |
| V-type proton ATPase subunit C 1                                  | Atp6v1c1   | IPI00213457 | 44  | 0   | 4                    | 9                    | 4                    | 2                    | 13                  | 6                   | -1.1 | 0.1119 | 0.9816          |
| Lysosome-associated membrane glycoprotein 2                       | Lamp2      | IPI00212730 | 45  | 1   | 16                   | 18                   | 13                   | 3                    | 34                  | 16                  | -1.1 | 0.0103 | 0.1145          |
| Isoform 1 of Cell division control protein 42 homolog             | Cdc42      | IPI00285606 | 21  | 0   | 13                   | 19                   | 8                    | 7                    | 32                  | 15                  | -1.1 | 0.0125 | 0.1380          |
| prominin 1 isoform 1                                              | Prom1      | IPI00325312 | 97  | 5   | 5                    | 0                    | 1                    | 1                    | 5                   | 2                   | -1.2 | 0.2843 | 1.0000          |
| Aquaporin-1                                                       | Aqp1       | IPI00327202 | 29  | 6   | 24                   | 34                   | 14                   | 12                   | 58                  | 26                  | -1.2 | 0.0004 | 0.0058          |

| Protein                                                            | Gene             | IPI                | MW         | TMD       | SpC                  |                      |                      |                      | ΣSpC                |                     | Rsc         | p             | BY <sub>p</sub> |
|--------------------------------------------------------------------|------------------|--------------------|------------|-----------|----------------------|----------------------|----------------------|----------------------|---------------------|---------------------|-------------|---------------|-----------------|
|                                                                    |                  |                    |            |           | BBMV <sub>CTX1</sub> | BBMV <sub>CTX2</sub> | BBMV <sub>PCT1</sub> | BBMV <sub>PCT2</sub> | BBMV <sub>CTX</sub> | BBMV <sub>PCT</sub> |             |               |                 |
| similar to Villin-like protein                                     | Vill             | IPI00373579        | 97         | 0         | 7                    | 23                   | 4                    | 9                    | 30                  | 13                  | -1.2        | 0.0090        | 0.1007          |
| napsin A aspartic peptidase                                        | Napsa            | IPI00212697        | 46         | 0         | 15                   | 41                   | 1                    | 23                   | 56                  | 24                  | -1.2        | 0.0003        | 0.0042          |
| Retinal dehydrogenase 1                                            | Aldh1a1          | IPI00332042        | 54         | 0         | 3                    | 0                    | 1                    | 0                    | 3                   | 1                   | -1.3        | 0.3701        | 1.0000          |
| Lysosomal acid phosphatase                                         | Acp2             | IPI00201276        | 48         | 2         | 7                    | 6                    | 5                    | 0                    | 13                  | 5                   | -1.3        | 0.0611        | 0.5625          |
| Myosin-10                                                          | Myh10            | IPI00211813        | 233        | 0         | 1                    | 15                   | 2                    | 4                    | 16                  | 6                   | -1.4        | 0.0330        | 0.3256          |
| Cystathionine gamma-lyase                                          | Cth              | IPI00194550        | 44         | 0         | 3                    | 8                    | 4                    | 0                    | 11                  | 4                   | -1.4        | 0.0740        | 0.6632          |
| Ras-related GTP binding C                                          | Rragc            | IPI00188288        | 44         | 0         | 3                    | 3                    | 2                    | 0                    | 6                   | 2                   | -1.4        | 0.1754        | 1.0000          |
| Ras-related protein Rab-8A                                         | Rab8a            | IPI00196789        | 24         | 0         | 0                    | 6                    | 2                    | 0                    | 6                   | 2                   | -1.4        | 0.1754        | 1.0000          |
| Epoxide hydrolase 1                                                | Ephx1            | IPI00209690        | 53         | 0         | 1                    | 5                    | 0                    | 2                    | 6                   | 2                   | -1.4        | 0.1754        | 1.0000          |
| <b>Kidney-specific Na-K-Cl symporter</b>                           | <b>Slc12a1</b>   | <b>IPI00213335</b> | <b>120</b> | <b>12</b> | <b>62</b>            | <b>61</b>            | <b>29</b>            | <b>18</b>            | <b>123</b>          | <b>47</b>           | <b>-1.4</b> | <b>0.0000</b> | <b>0.0000</b>   |
| Guanine nucleotide-binding protein G(k) subunit alpha              | Gnai3            | IPI00231726        | 41         | 0         | 5                    | 18                   | 2                    | 6                    | 23                  | 8                   | -1.5        | 0.0065        | 0.0773          |
| Adaptor protein complex AP-2, alpha 2 subunit                      | Ap2a2            | IPI00471901        | 104        | 0         | 7                    | 5                    | 1                    | 3                    | 12                  | 4                   | -1.5        | 0.0469        | 0.4467          |
| <b>Neutral and basic amino acid transport protein rBAT</b>         | <b>Slc3a1</b>    | <b>IPI00211648</b> | <b>79</b>  | <b>1</b>  | <b>393</b>           | <b>415</b>           | <b>104</b>           | <b>190</b>           | <b>808</b>          | <b>294</b>          | <b>-1.5</b> | <b>0.0000</b> | <b>0.0000</b>   |
| <b>Gamma-glutamyltranspeptidase 1</b>                              | <b>Ggt1</b>      | <b>IPI00206254</b> | <b>62</b>  | <b>1</b>  | <b>166</b>           | <b>149</b>           | <b>41</b>            | <b>67</b>            | <b>315</b>          | <b>108</b>          | <b>-1.6</b> | <b>0.0000</b> | <b>0.0000</b>   |
| Elongation factor 2                                                | Eef2             | IPI00203214        | 95         | 0         | 1                    | 3                    | 0                    | 1                    | 4                   | 1                   | -1.6        | 0.2141        | 1.0000          |
| <b>ATPase, H<sup>+</sup> transporting, lysosomal V0 subunit A4</b> | <b>Atp6v0a4</b>  | <b>IPI00193777</b> | <b>95</b>  | <b>6</b>  | <b>85</b>            | <b>96</b>            | <b>33</b>            | <b>24</b>            | <b>181</b>          | <b>57</b>           | <b>-1.7</b> | <b>0.0000</b> | <b>0.0000</b>   |
| <b>ATP-binding cassette sub-family G member 2</b>                  | <b>Abcg2</b>     | <b>IPI00327093</b> | <b>73</b>  | <b>6</b>  | <b>69</b>            | <b>76</b>            | <b>21</b>            | <b>23</b>            | <b>145</b>          | <b>44</b>           | <b>-1.7</b> | <b>0.0000</b> | <b>0.0000</b>   |
| <b>ATPase, H<sup>+</sup> transporting, lysosomal V0 subunit D1</b> | <b>Atp6v0d1</b>  | <b>IPI00476086</b> | <b>40</b>  | <b>0</b>  | <b>49</b>            | <b>53</b>            | <b>14</b>            | <b>16</b>            | <b>102</b>          | <b>30</b>           | <b>-1.8</b> | <b>0.0000</b> | <b>0.0000</b>   |
| Myosin-ld                                                          | Myo1d            | IPI00207989        | 116        | 0         | 1                    | 4                    | 1                    | 0                    | 5                   | 1                   | -1.9        | 0.1213        | 1.0000          |
| <b>High-affinity sodium-dependent carnitine cotransporter</b>      | <b>Slc22a5</b>   | <b>IPI00199585</b> | <b>63</b>  | <b>11</b> | <b>15</b>            | <b>28</b>            | <b>4</b>             | <b>7</b>             | <b>43</b>           | <b>11</b>           | <b>-2.0</b> | <b>0.0000</b> | <b>0.0002</b>   |
| <b>System B(0) neutral amino acid transporter(B(0)AT1</b>          | <b>Slc6a19</b>   | <b>IPI00391783</b> | <b>57</b>  | <b>10</b> | <b>34</b>            | <b>53</b>            | <b>19</b>            | <b>3</b>             | <b>87</b>           | <b>22</b>           | <b>-2.0</b> | <b>0.0000</b> | <b>0.0000</b>   |
| <b>Clathrin heavy chain 1</b>                                      | <b>Cltc</b>      | <b>IPI00193983</b> | <b>192</b> | <b>0</b>  | <b>145</b>           | <b>59</b>            | <b>26</b>            | <b>26</b>            | <b>204</b>          | <b>52</b>           | <b>-2.0</b> | <b>0.0000</b> | <b>0.0000</b>   |
| <b>Sodium-dependent phosphate transport protein 2A</b>             | <b>Slc34a1</b>   | <b>IPI00193397</b> | <b>69</b>  | <b>11</b> | <b>26</b>            | <b>20</b>            | <b>7</b>             | <b>4</b>             | <b>46</b>           | <b>11</b>           | <b>-2.0</b> | <b>0.0000</b> | <b>0.0000</b>   |
| Guanine nucleotide-binding protein subunit alpha-11                | Gna11            | IPI00200437        | 42         | 0         | 10                   | 8                    | 2                    | 2                    | 18                  | 4                   | -2.1        | 0.0024        | 0.0290          |
| <b>Isoform B of AP-1 complex subunit beta-1</b>                    | <b>Ap1b1</b>     | <b>IPI00201713</b> | <b>104</b> | <b>0</b>  | <b>26</b>            | <b>14</b>            | <b>6</b>             | <b>3</b>             | <b>40</b>           | <b>9</b>            | <b>-2.1</b> | <b>0.0000</b> | <b>0.0001</b>   |
| <b>similar to Myosin-6</b>                                         | <b>Myo6</b>      | <b>IPI00764111</b> | <b>148</b> | <b>0</b>  | <b>54</b>            | <b>92</b>            | <b>6</b>             | <b>28</b>            | <b>146</b>          | <b>34</b>           | <b>-2.1</b> | <b>0.0000</b> | <b>0.0000</b>   |
| <b>ADP-ribosylation factor-like protein 8B</b>                     | <b>Arl8b</b>     | <b>IPI00191587</b> | <b>22</b>  | <b>0</b>  | <b>9</b>             | <b>28</b>            | <b>8</b>             | <b>0</b>             | <b>37</b>           | <b>8</b>            | <b>-2.2</b> | <b>0.0000</b> | <b>0.0002</b>   |
| G(I)/G(S)/G(T) subunit beta-1                                      | Gnb1             | IPI00212655        | 37         | 0         | 10                   | 11                   | 2                    | 2                    | 21                  | 4                   | -2.3        | 0.0005        | 0.0066          |
| six transmembrane epithelial antigen of the prostate 2             | Steap2           | IPI00372913        | 56         | 6         | 6                    | 2                    | 1                    | 0                    | 8                   | 1                   | -2.5        | 0.0203        | 0.2111          |
| <b>G(i), alpha-2 subunit</b>                                       | <b>Gnai2</b>     | <b>IPI00231925</b> | <b>41</b>  | <b>0</b>  | <b>8</b>             | <b>17</b>            | <b>0</b>             | <b>4</b>             | <b>25</b>           | <b>4</b>            | <b>-2.5</b> | <b>0.0001</b> | <b>0.0009</b>   |
| <b>G(s) subunit alpha isoforms XLas</b>                            | <b>Gnas</b>      | <b>IPI00464920</b> | <b>123</b> | <b>0</b>  | <b>19</b>            | <b>21</b>            | <b>4</b>             | <b>2</b>             | <b>40</b>           | <b>6</b>            | <b>-2.7</b> | <b>0.0000</b> | <b>0.0000</b>   |
| <b>Glutamine synthetase</b>                                        | <b>Glul</b>      | <b>IPI00324020</b> | <b>42</b>  | <b>0</b>  | <b>40</b>            | <b>47</b>            | <b>2</b>             | <b>11</b>            | <b>87</b>           | <b>13</b>           | <b>-2.7</b> | <b>0.0000</b> | <b>0.0000</b>   |
| Pincher                                                            | Ehd4             | IPI00200271        | 61         | 0         | 1                    | 2                    | 0                    | 0                    | 3                   | 0                   | -2.8        | 0.1213        | 1.0000          |
| <b>Isoform 2 of AP-2 complex subunit beta-1</b>                    | <b>Ap2b1</b>     | <b>IPI00231502</b> | <b>106</b> | <b>0</b>  | <b>24</b>            | <b>9</b>             | <b>3</b>             | <b>1</b>             | <b>33</b>           | <b>4</b>            | <b>-2.9</b> | <b>0.0000</b> | <b>0.0000</b>   |
| Multidrug and toxin extrusion protein 1                            | Slc47a1          | IPI00372592        | 61         | 13        | 16                   | 3                    | 2                    | 0                    | 19                  | 2                   | -3.0        | 0.0001        | 0.0017          |
| <b>myosin IC</b>                                                   | <b>Myo1c</b>     | <b>IPI00393867</b> | <b>120</b> | <b>0</b>  | <b>10</b>            | <b>11</b>            | <b>1</b>             | <b>1</b>             | <b>21</b>           | <b>2</b>            | <b>-3.1</b> | <b>0.0000</b> | <b>0.0005</b>   |
| <b>hemoglobin alpha 2 chain</b>                                    | <b>LOC360504</b> | <b>IPI00205036</b> | <b>15</b>  | <b>0</b>  | <b>46</b>            | <b>53</b>            | <b>4</b>             | <b>7</b>             | <b>99</b>           | <b>11</b>           | <b>-3.1</b> | <b>0.0000</b> | <b>0.0000</b>   |
| similar to Harmonin isoform 1                                      | Ush1c            | IPI00209014        | 102        | 0         | 9                    | 6                    | 0                    | 1                    | 15                  | 1                   | -3.4        | 0.0002        | 0.0037          |
| <b>similar to myosin VIIb</b>                                      | <b>Myo7b</b>     | <b>IPI00208315</b> | <b>241</b> | <b>0</b>  | <b>28</b>            | <b>47</b>            | <b>3</b>             | <b>3</b>             | <b>75</b>           | <b>6</b>            | <b>-3.6</b> | <b>0.0000</b> | <b>0.0000</b>   |
| Fetub protein                                                      | Fetub            | IPI00212708        | 43         | 0         | 5                    | 1                    | 0                    | 0                    | 6                   | 0                   | -3.7        | 0.0147        | 0.1600          |
| Sodium-independent sulfate anion transporter                       | Slc26a11         | IPI00372997        | 39         | 4         | 2                    | 4                    | 0                    | 0                    | 6                   | 0                   | -3.7        | 0.0147        | 0.1600          |
| <b>guanine nucleotide binding protein, alpha q polypeptide</b>     | <b>Gnaq</b>      | <b>IPI00230868</b> | <b>42</b>  | <b>0</b>  | <b>14</b>            | <b>8</b>             | <b>1</b>             | <b>0</b>             | <b>22</b>           | <b>1</b>            | <b>-3.9</b> | <b>0.0000</b> | <b>0.0001</b>   |

| Protein                                                     | Gene            | IPI                | MW         | TMD       | SpC                  |                      |                      |                      | ΣSpC                |                     | Rsc         | p             | BY <sub>p</sub> |
|-------------------------------------------------------------|-----------------|--------------------|------------|-----------|----------------------|----------------------|----------------------|----------------------|---------------------|---------------------|-------------|---------------|-----------------|
|                                                             |                 |                    |            |           | BBMV <sub>CTX1</sub> | BBMV <sub>CTX2</sub> | BBMV <sub>PCT1</sub> | BBMV <sub>PCT2</sub> | BBMV <sub>CTX</sub> | BBMV <sub>PCT</sub> |             |               |                 |
| Isoform 7 of Solute carrier organic anion transporter 1A3   | Slc21a4         | IPI00231181        | 63         | 7         | 7                    | 4                    | 0                    | 0                    | 11                  | 0                   | -4.6        | 0.0004        | 0.0061          |
| DnaJ homolog subfamily C member 5                           | Dnajc5          | IPI00210881        | 22         | 0         | 6                    | 5                    | 0                    | 0                    | 11                  | 0                   | -4.6        | 0.0004        | 0.0061          |
| <b>Meprin A subunit alpha</b>                               | <b>Mep1a</b>    | <b>IPI00210872</b> | <b>85</b>  | <b>1</b>  | <b>62</b>            | <b>38</b>            | <b>0</b>             | <b>3</b>             | <b>100</b>          | <b>3</b>            | <b>-4.9</b> | <b>0.0000</b> | <b>0.0000</b>   |
| <b>Serum albumin</b>                                        | <b>Alb</b>      | <b>IPI00191737</b> | <b>69</b>  | <b>0</b>  | <b>9</b>             | <b>5</b>             | <b>0</b>             | <b>0</b>             | <b>14</b>           | <b>0</b>            | <b>-4.9</b> | <b>0.0001</b> | <b>0.0009</b>   |
| <b>Band 3 anion transport protein</b>                       | <b>Slc4a1</b>   | <b>IPI00231379</b> | <b>103</b> | <b>10</b> | <b>4</b>             | <b>10</b>            | <b>0</b>             | <b>0</b>             | <b>14</b>           | <b>0</b>            | <b>-4.9</b> | <b>0.0001</b> | <b>0.0009</b>   |
| <b>Neprilysin</b>                                           | <b>Mme</b>      | <b>IPI00231789</b> | <b>86</b>  | <b>1</b>  | <b>128</b>           | <b>90</b>            | <b>1</b>             | <b>6</b>             | <b>218</b>          | <b>7</b>            | <b>-4.9</b> | <b>0.0000</b> | <b>0.0000</b>   |
| <b>Thiazide-sensitive sodium-chloride cotransporter</b>     | <b>Slc12a3</b>  | <b>IPI00231043</b> | <b>111</b> | <b>11</b> | <b>16</b>            | <b>29</b>            | <b>1</b>             | <b>0</b>             | <b>45</b>           | <b>1</b>            | <b>-5.0</b> | <b>0.0000</b> | <b>0.0000</b>   |
| <b>Multidrug resistance protein 1a</b>                      | <b>Abcb1a</b>   | <b>IPI00470287</b> | <b>140</b> | <b>11</b> | <b>10</b>            | <b>5</b>             | <b>0</b>             | <b>0</b>             | <b>15</b>           | <b>0</b>            | <b>-5.0</b> | <b>0.0000</b> | <b>0.0005</b>   |
| <b>23 kDa protein</b>                                       | <b>Chp</b>      | <b>IPI00207794</b> | <b>23</b>  | <b>0</b>  | <b>7</b>             | <b>11</b>            | <b>0</b>             | <b>0</b>             | <b>18</b>           | <b>0</b>            | <b>-5.2</b> | <b>0.0000</b> | <b>0.0001</b>   |
| <b>Podocalyxin</b>                                          | <b>Podxl</b>    | <b>IPI00325860</b> | <b>52</b>  | <b>1</b>  | <b>4</b>             | <b>14</b>            | <b>0</b>             | <b>0</b>             | <b>18</b>           | <b>0</b>            | <b>-5.2</b> | <b>0.0000</b> | <b>0.0001</b>   |
| <b>ATPase, class VI, type 11A</b>                           | <b>Atp11a</b>   | <b>IPI00869709</b> | <b>136</b> | <b>7</b>  | <b>11</b>            | <b>8</b>             | <b>0</b>             | <b>0</b>             | <b>19</b>           | <b>0</b>            | <b>-5.3</b> | <b>0.0000</b> | <b>0.0000</b>   |
| <b>V-H+ATPase subunit a1-IV</b>                             | <b>Atp6v0a1</b> | <b>IPI00202120</b> | <b>97</b>  | <b>6</b>  | <b>14</b>            | <b>8</b>             | <b>0</b>             | <b>0</b>             | <b>22</b>           | <b>0</b>            | <b>-5.5</b> | <b>0.0000</b> | <b>0.0000</b>   |
| <b>Sodium/glucose cotransporter 1</b>                       | <b>Slc5a1</b>   | <b>IPI00212933</b> | <b>73</b>  | <b>14</b> | <b>15</b>            | <b>7</b>             | <b>0</b>             | <b>0</b>             | <b>22</b>           | <b>0</b>            | <b>-5.5</b> | <b>0.0000</b> | <b>0.0000</b>   |
| <b>Hemoglobin subunit beta-1</b>                            | <b>Hbb</b>      | <b>IPI00230897</b> | <b>16</b>  | <b>0</b>  | <b>24</b>            | <b>46</b>            | <b>1</b>             | <b>0</b>             | <b>70</b>           | <b>1</b>            | <b>-5.6</b> | <b>0.0000</b> | <b>0.0000</b>   |
| <b>Monoglyceride lipase</b>                                 | <b>Mgll</b>     | <b>IPI00197344</b> | <b>33</b>  | <b>0</b>  | <b>16</b>            | <b>10</b>            | <b>0</b>             | <b>0</b>             | <b>26</b>           | <b>0</b>            | <b>-5.8</b> | <b>0.0000</b> | <b>0.0000</b>   |
| <b>Sodium- and chloride-dependent transporter XTRP2</b>     | <b>Slc6a18</b>  | <b>IPI00207180</b> | <b>70</b>  | <b>12</b> | <b>14</b>            | <b>13</b>            | <b>0</b>             | <b>0</b>             | <b>27</b>           | <b>0</b>            | <b>-5.8</b> | <b>0.0000</b> | <b>0.0000</b>   |
| <b>Organic anion transporting polypeptide A</b>             | <b>Slco1a1</b>  | <b>IPI00214674</b> | <b>74</b>  | <b>10</b> | <b>16</b>            | <b>11</b>            | <b>0</b>             | <b>0</b>             | <b>27</b>           | <b>0</b>            | <b>-5.8</b> | <b>0.0000</b> | <b>0.0000</b>   |
| <b>Sodium-independent aspartate/glutamate transporter 1</b> | <b>Slc7a13</b>  | <b>IPI00388452</b> | <b>54</b>  | <b>9</b>  | <b>24</b>            | <b>17</b>            | <b>0</b>             | <b>0</b>             | <b>41</b>           | <b>0</b>            | <b>-6.4</b> | <b>0.0000</b> | <b>0.0000</b>   |
| <b>Na(+)/glucose cotransporter 5</b>                        | <b>Slc5a10</b>  | <b>IPI00369551</b> | <b>65</b>  | <b>14</b> | <b>31</b>            | <b>18</b>            | <b>0</b>             | <b>0</b>             | <b>49</b>           | <b>0</b>            | <b>-6.7</b> | <b>0.0000</b> | <b>0.0000</b>   |
| <b>Urate anion exchanger 1</b>                              | <b>Slc22a12</b> | <b>IPI00554326</b> | <b>60</b>  | <b>10</b> | <b>17</b>            | <b>32</b>            | <b>0</b>             | <b>0</b>             | <b>49</b>           | <b>0</b>            | <b>-6.7</b> | <b>0.0000</b> | <b>0.0000</b>   |
| <b>Peptide transporter 2</b>                                | <b>Slc15a2</b>  | <b>IPI00326990</b> | <b>83</b>  | <b>11</b> | <b>30</b>            | <b>21</b>            | <b>0</b>             | <b>0</b>             | <b>51</b>           | <b>0</b>            | <b>-6.7</b> | <b>0.0000</b> | <b>0.0000</b>   |
| <b>Meprin A subunit beta</b>                                | <b>Mep1b</b>    | <b>IPI00204808</b> | <b>79</b>  | <b>1</b>  | <b>89</b>            | <b>87</b>            | <b>0</b>             | <b>1</b>             | <b>176</b>          | <b>1</b>            | <b>-6.9</b> | <b>0.0000</b> | <b>0.0000</b>   |
| <b>Sodium-dependent vitamin C transporter 1</b>             | <b>Slc23a1</b>  | <b>IPI00203446</b> | <b>65</b>  | <b>10</b> | <b>36</b>            | <b>27</b>            | <b>0</b>             | <b>0</b>             | <b>63</b>           | <b>0</b>            | <b>-7.0</b> | <b>0.0000</b> | <b>0.0000</b>   |
