# Supplementary material
Source: PubMed Central journal article supplement (PMC2886813)

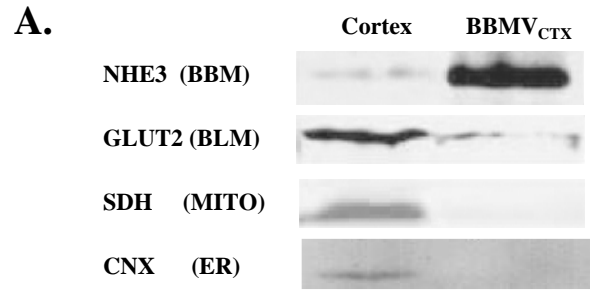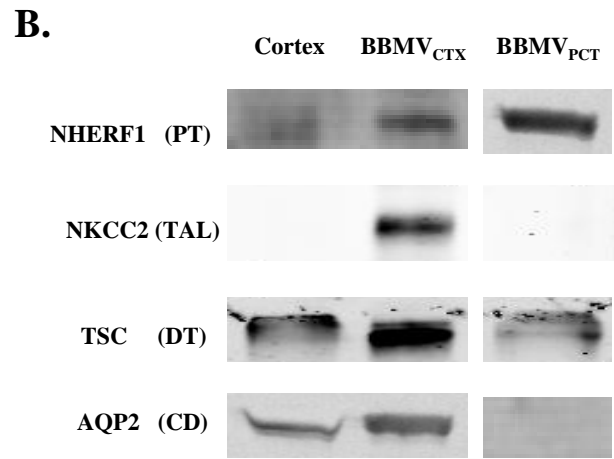

Supplement: 00711.2009v2_1.pdf [file 00711.2009v2_1.pdf]
